# Supplementary material for: Antioxidant and Neuroprotective Effects of Paeonol against Oxidative Stress and Altered Carrier-Mediated Transport System on NSC-34 Cell Lines
Source: MDPI journal article supplement (doi:10.3390/antiox11071392), 2022-07-18
Supplement: s1 [file s1]

## Supplementary Information

A

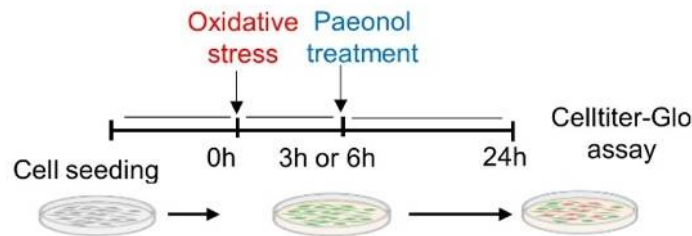

B

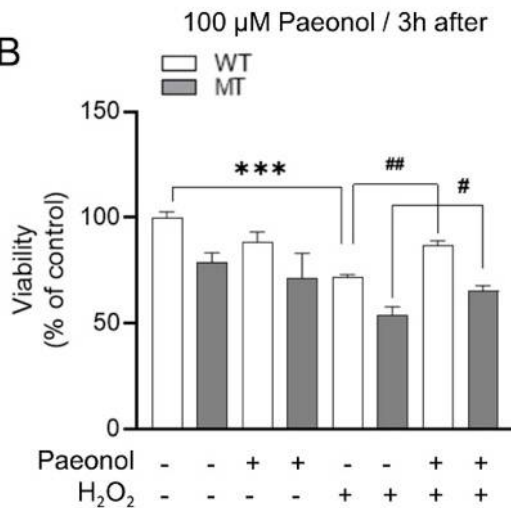

C

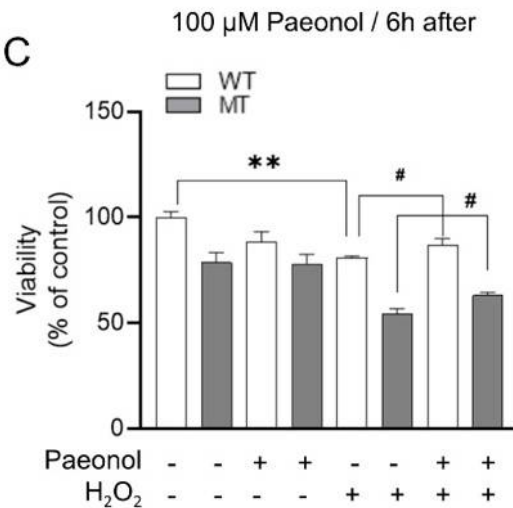

**Supplementary Figure S1. Post-treatment of paeonol is protective against H<sub>2</sub>O<sub>2</sub>-induced cell death in motor neuron cell line (NSC-34).** (A) A scheme illustrating the experimental flow of paeonol and H<sub>2</sub>O<sub>2</sub> treatment *in vitro*. (B and C) Paeonol was treated in WT and MT cell line 3 h (B) after or 6 h (C) after treatment with H<sub>2</sub>O<sub>2</sub> (300  $\mu$ M). Cell viability was determined by CellTiter-Glo assay. Each graph represents the mean  $\pm$  SEM of 3~4 separate experiments. Significantly different from control at \*\* $P$  < 0.01, \*\*\* $P$  < 0.001. Significantly different from H<sub>2</sub>O<sub>2</sub> treated cells at # $P$  < 0.05, ## $P$  < 0.01.
